# Supplementary material for: Predicting response to neoadjuvant chemotherapy with liquid biopsies and multiparametric MRI in patients with breast cancer
Source: PubMed Central journal article supplement (PMC10799888; doi:10.1038/s41523-024-00611-z), 2024-01-20
Supplement: 41523_2024_611_MOESM1_ESM.pdf [file 41523_2024_611_MOESM1_ESM.pdf]

### Supplementary figure 1

Plot on missing liquid biopsy samples. Each horizontal row represent a missing data pattern and how many times it occurred. Each vertical row represents a timepoint at which a liquid biopsy was collected. A blue square means the sample was available for analysis, a red square means it was missing.

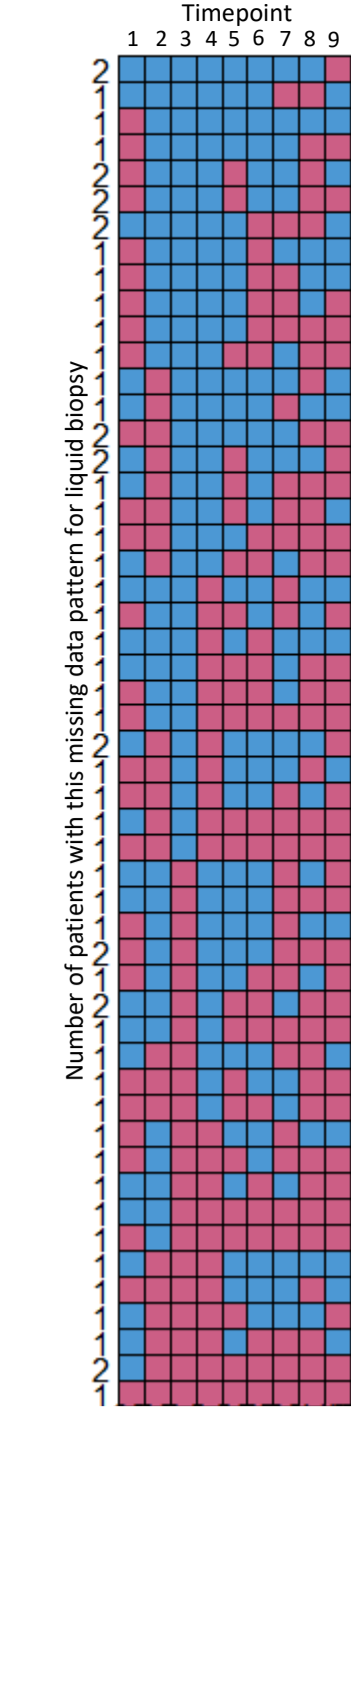

### Supplementary figure 2

ROC curves of models at timepoint 1 (a), timepoint 2 (b, d-i) and timepoint 3 (c, j-o) discriminating between pCR (RCB=0) and residual disease (RCB>0). Sensitivity = the % of patients with pCR correctly classified by the model. Specificity = the % of patients with residual disease correctly classified by the model

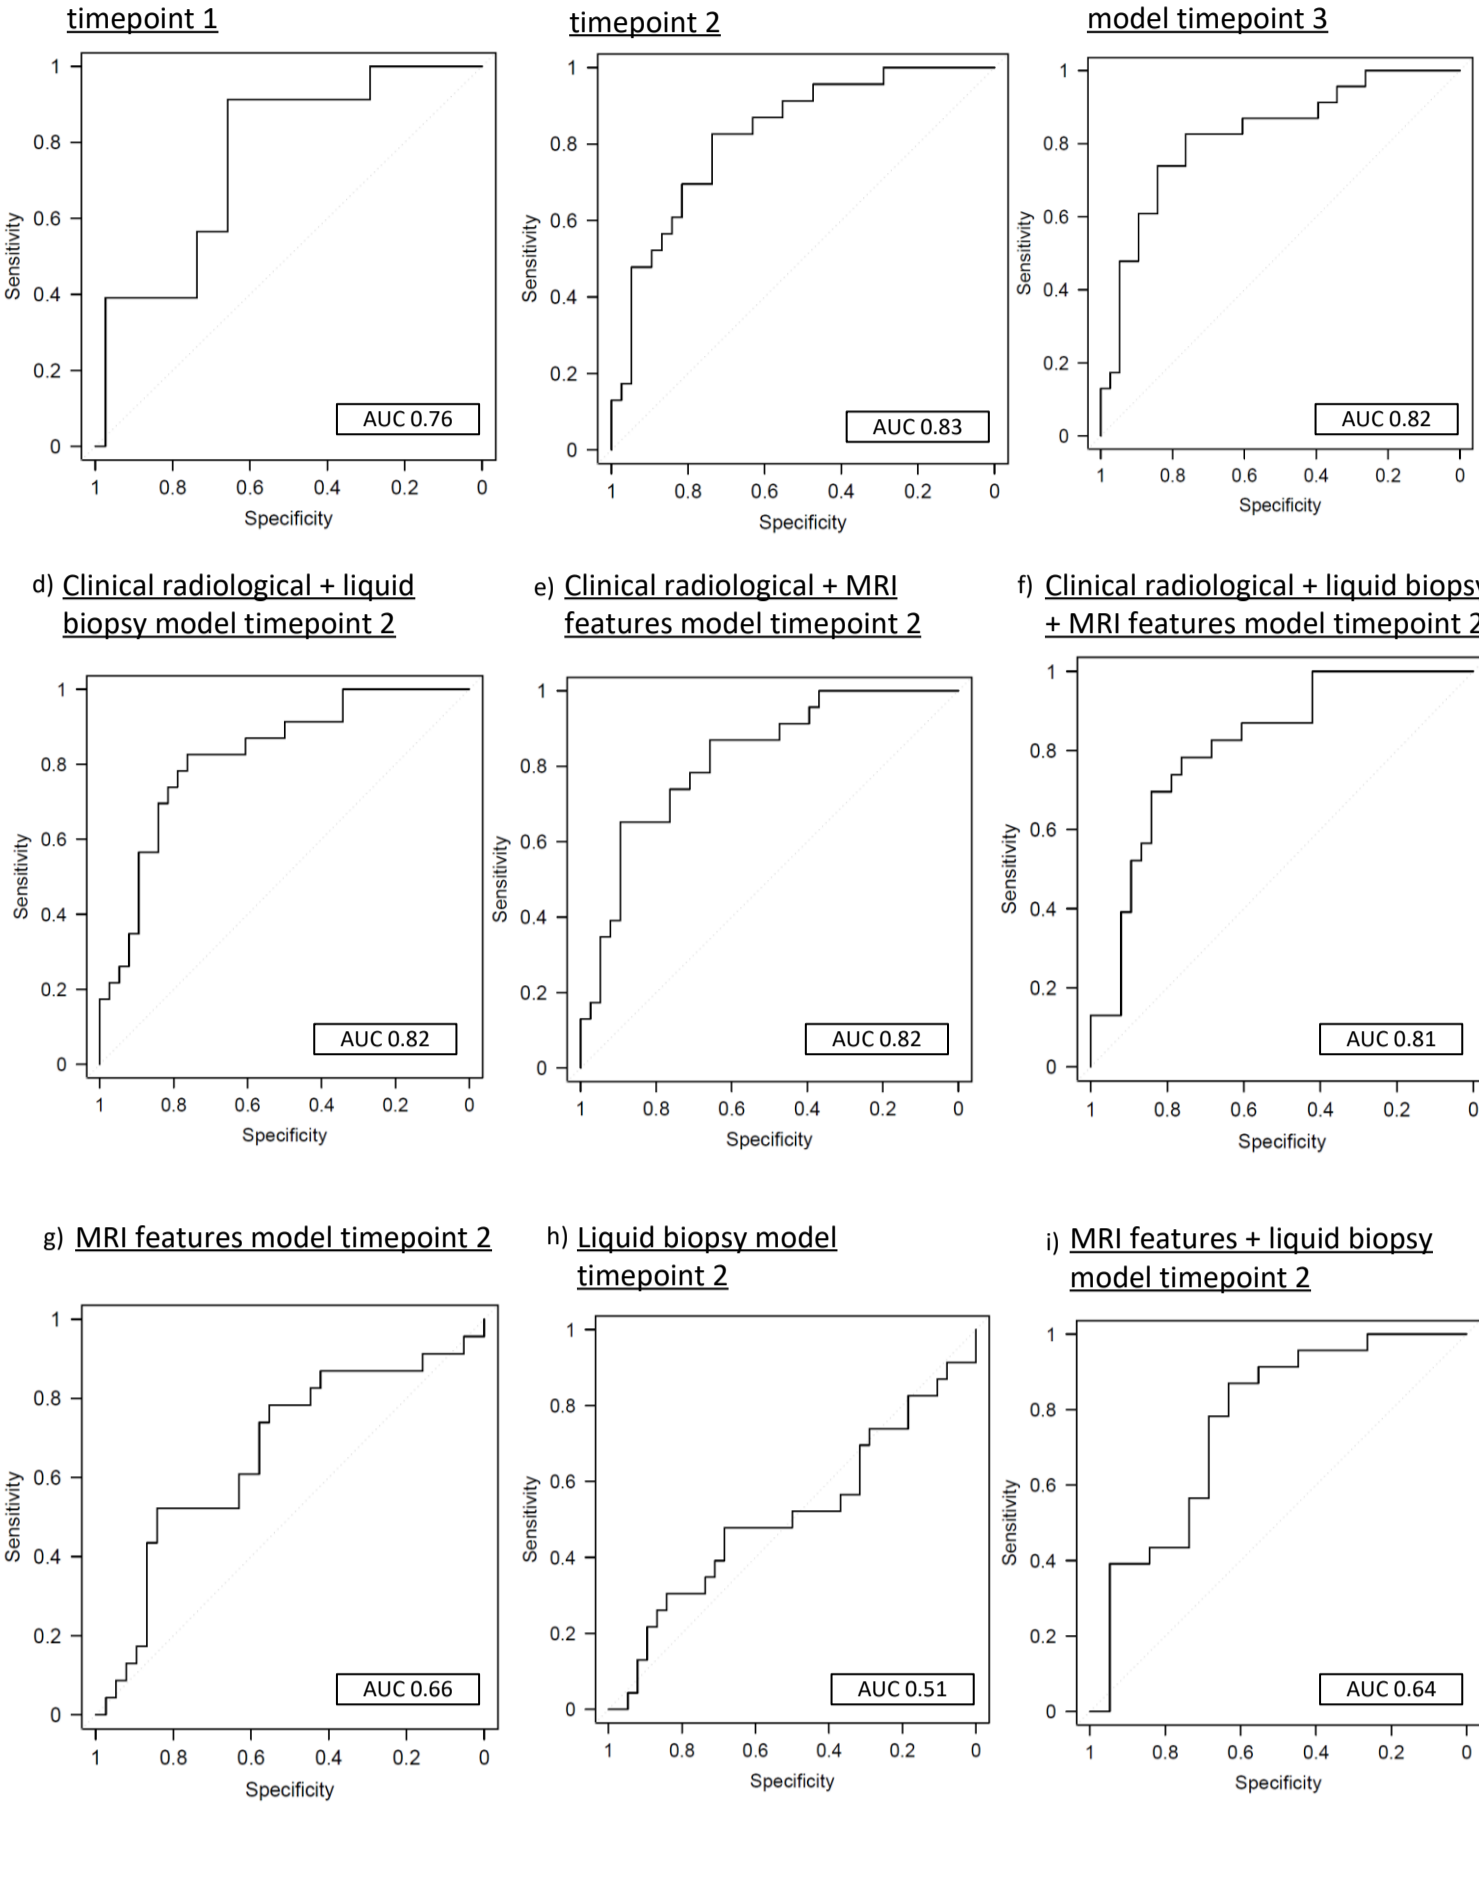

### Supplementary figure 2 (continued)

ROC curves of models at timepoint 1 (a), timepoint 2 (b, d-i) and timepoint 3 (c, j-o) discriminating between pCR (RCB=0) and residual disease (RCB>0). Sensitivity = the % of patients with pCR correctly classified by the model. Specificity = the % of patients with residual disease correctly classified by the model

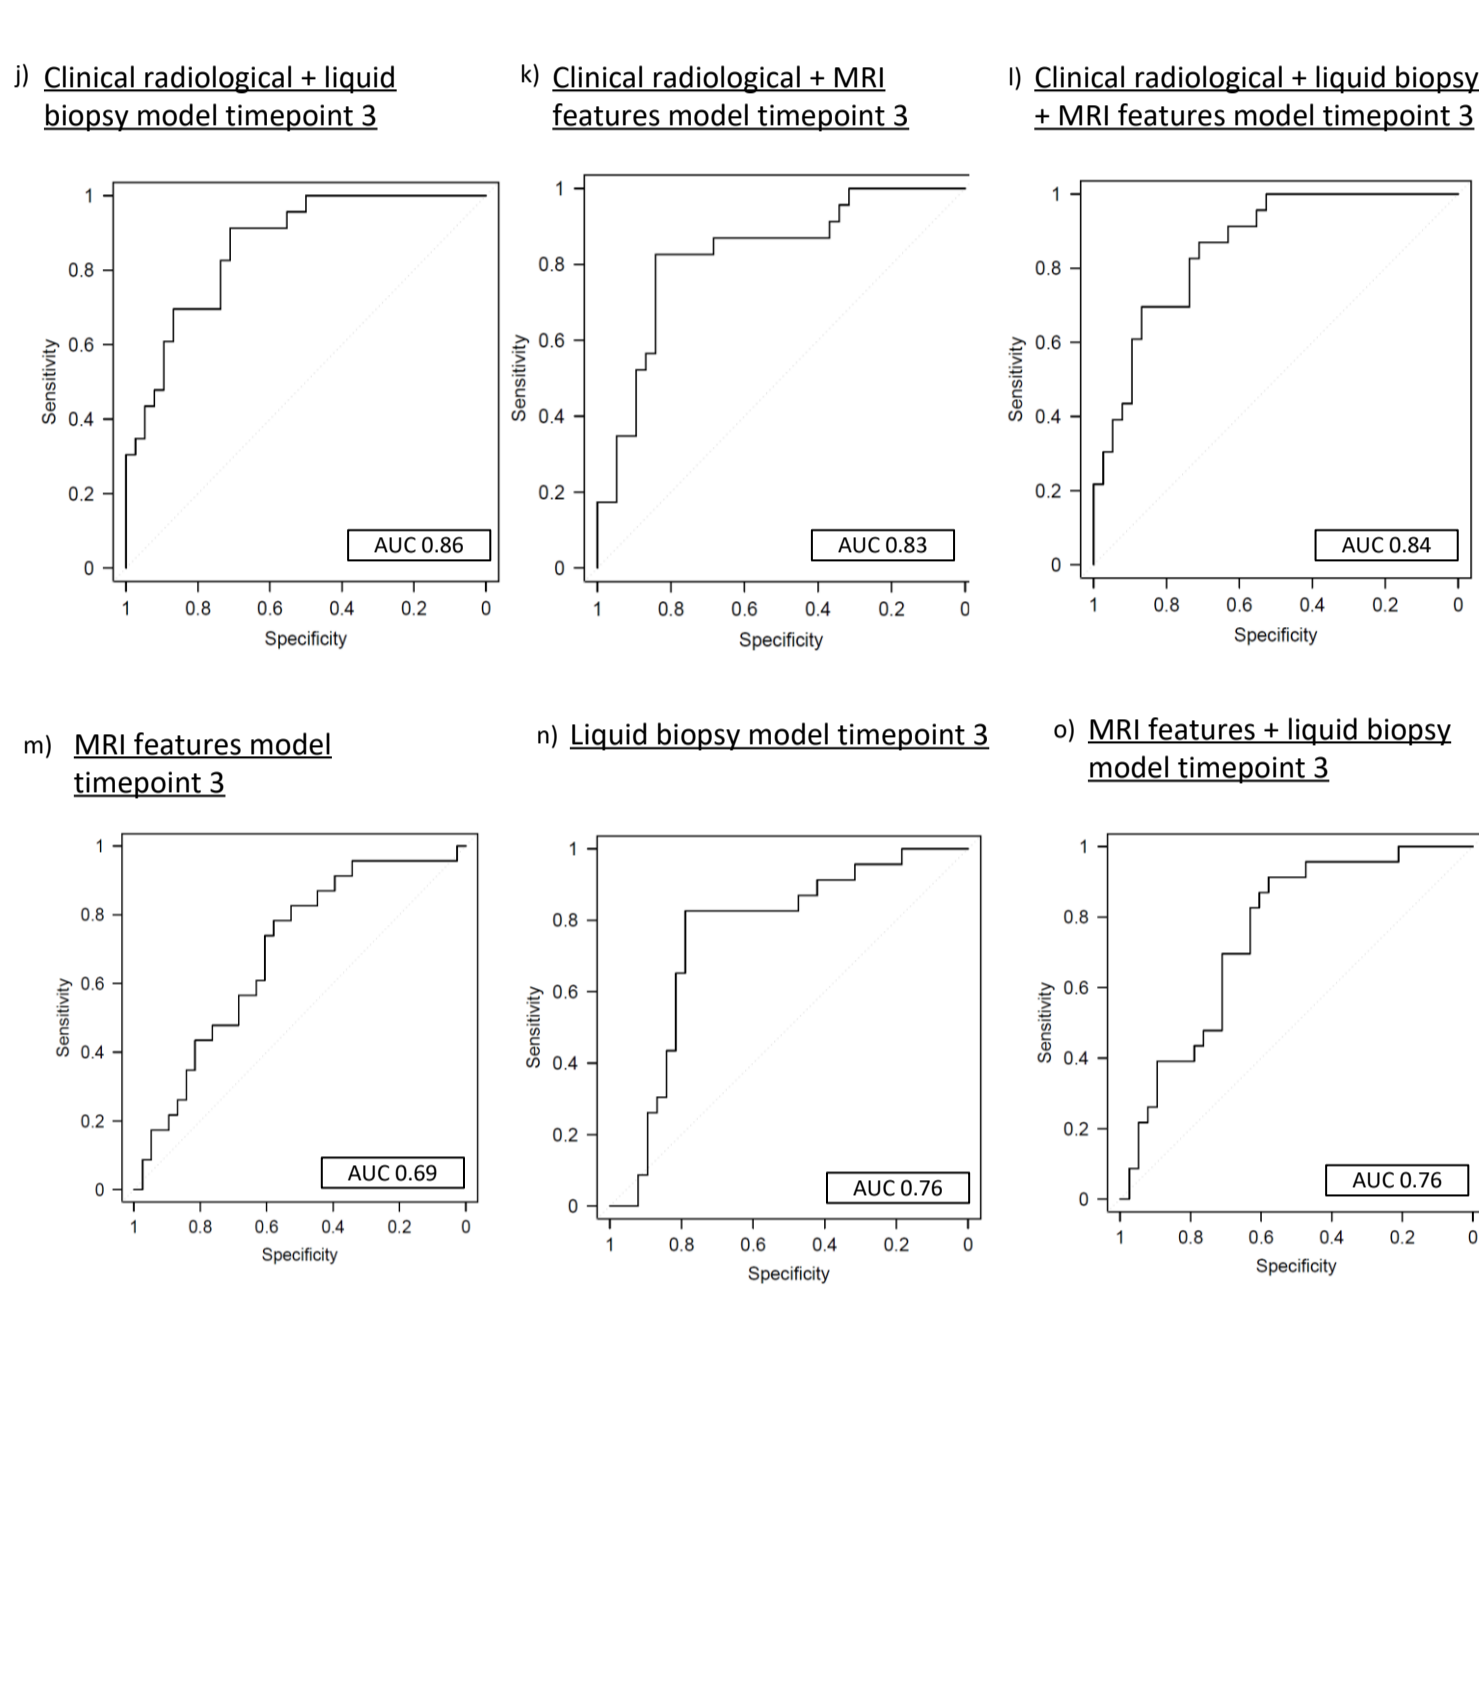

### Supplementary figure 3

Calibration plots of models at timepoint 1 (a), timepoint 2 (b, d-i) and timepoint 3 (c, j-o)

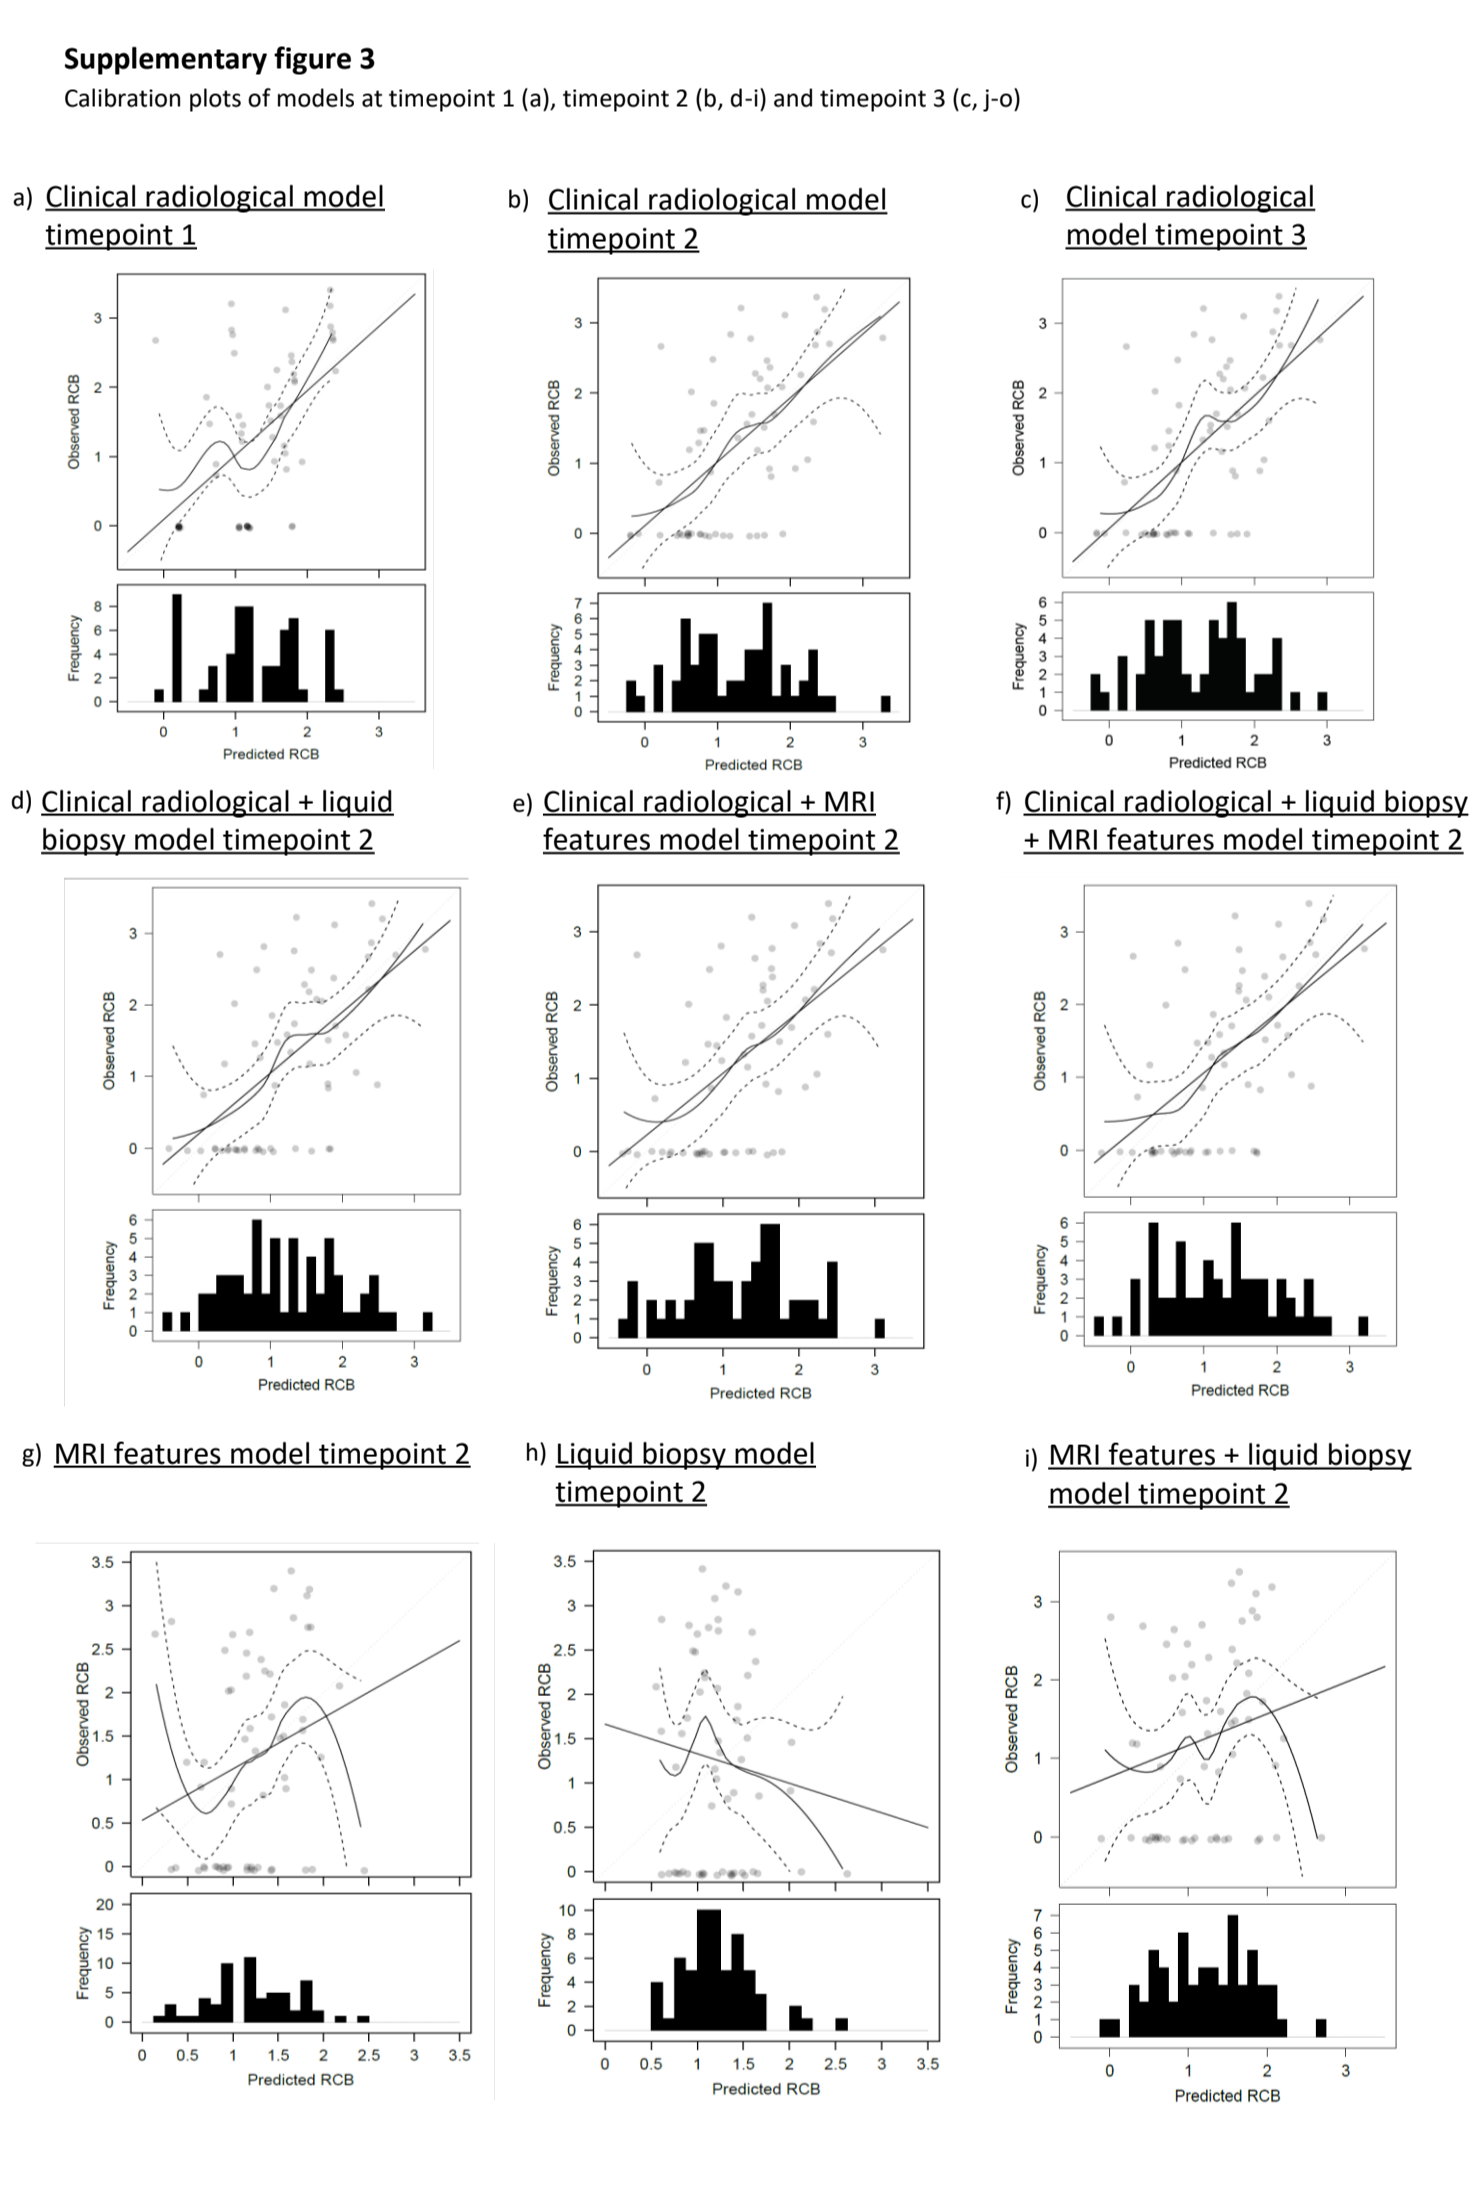

### Supplementary figure 3 (continued)

Calibration plots of models at timepoint 1 (a), timepoint 2 (b, d-i) and timepoint 3 (c, j-o)

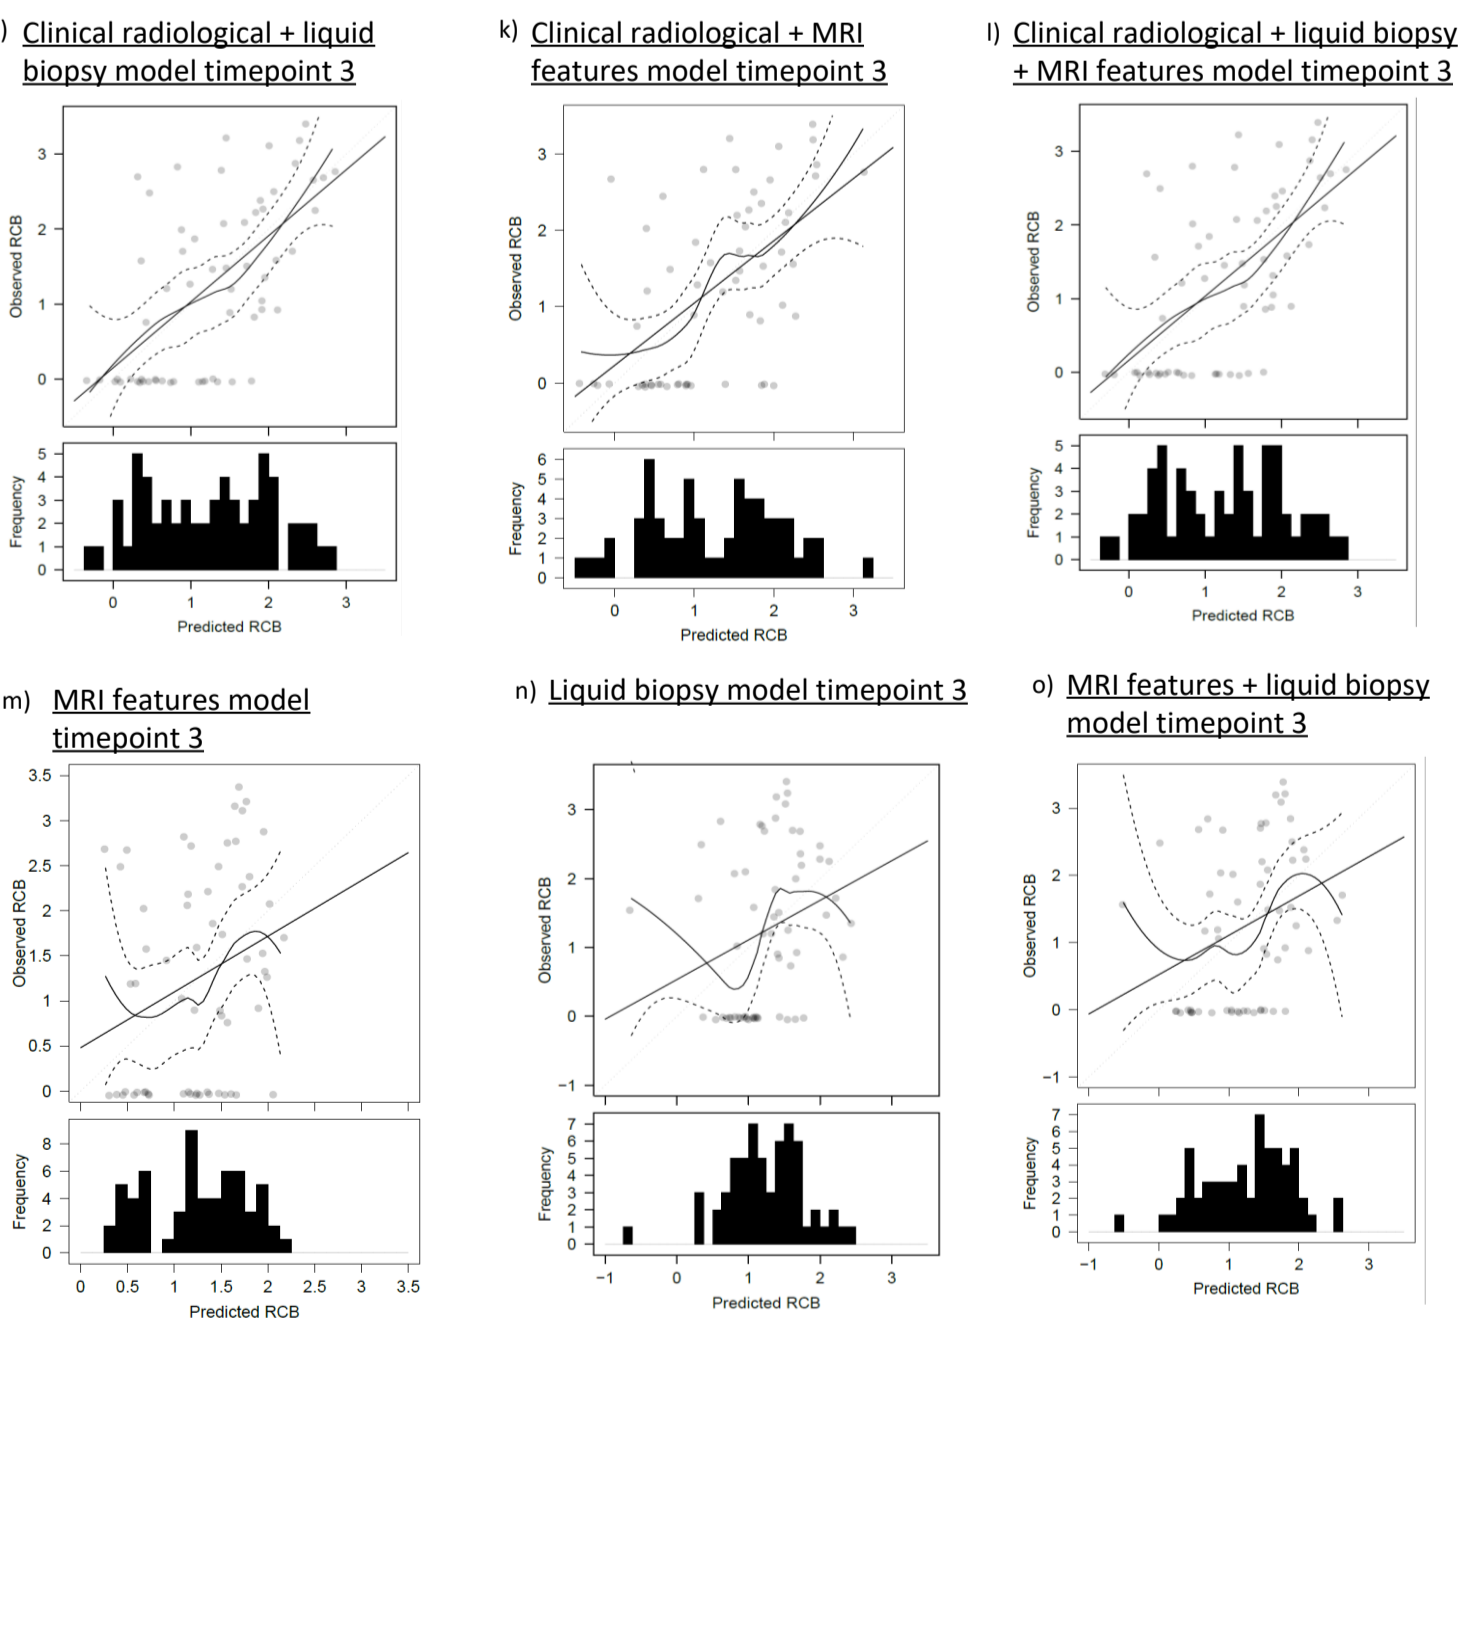

### Supplementary figure 4

Scatterplots depicting the correlation including Pearson correlation coefficient between RCB and the trend of biomarkers between timepoint 1 and 3 for the methylation markers (a-g) and the total amount of ctDNA (h)

a) methylation index score b) AKR1B1 c) GPX7 d) HIST1H3C e) SCGB3A1 f) TM6SF1 g) TMEFF2 and h) total ctDNA

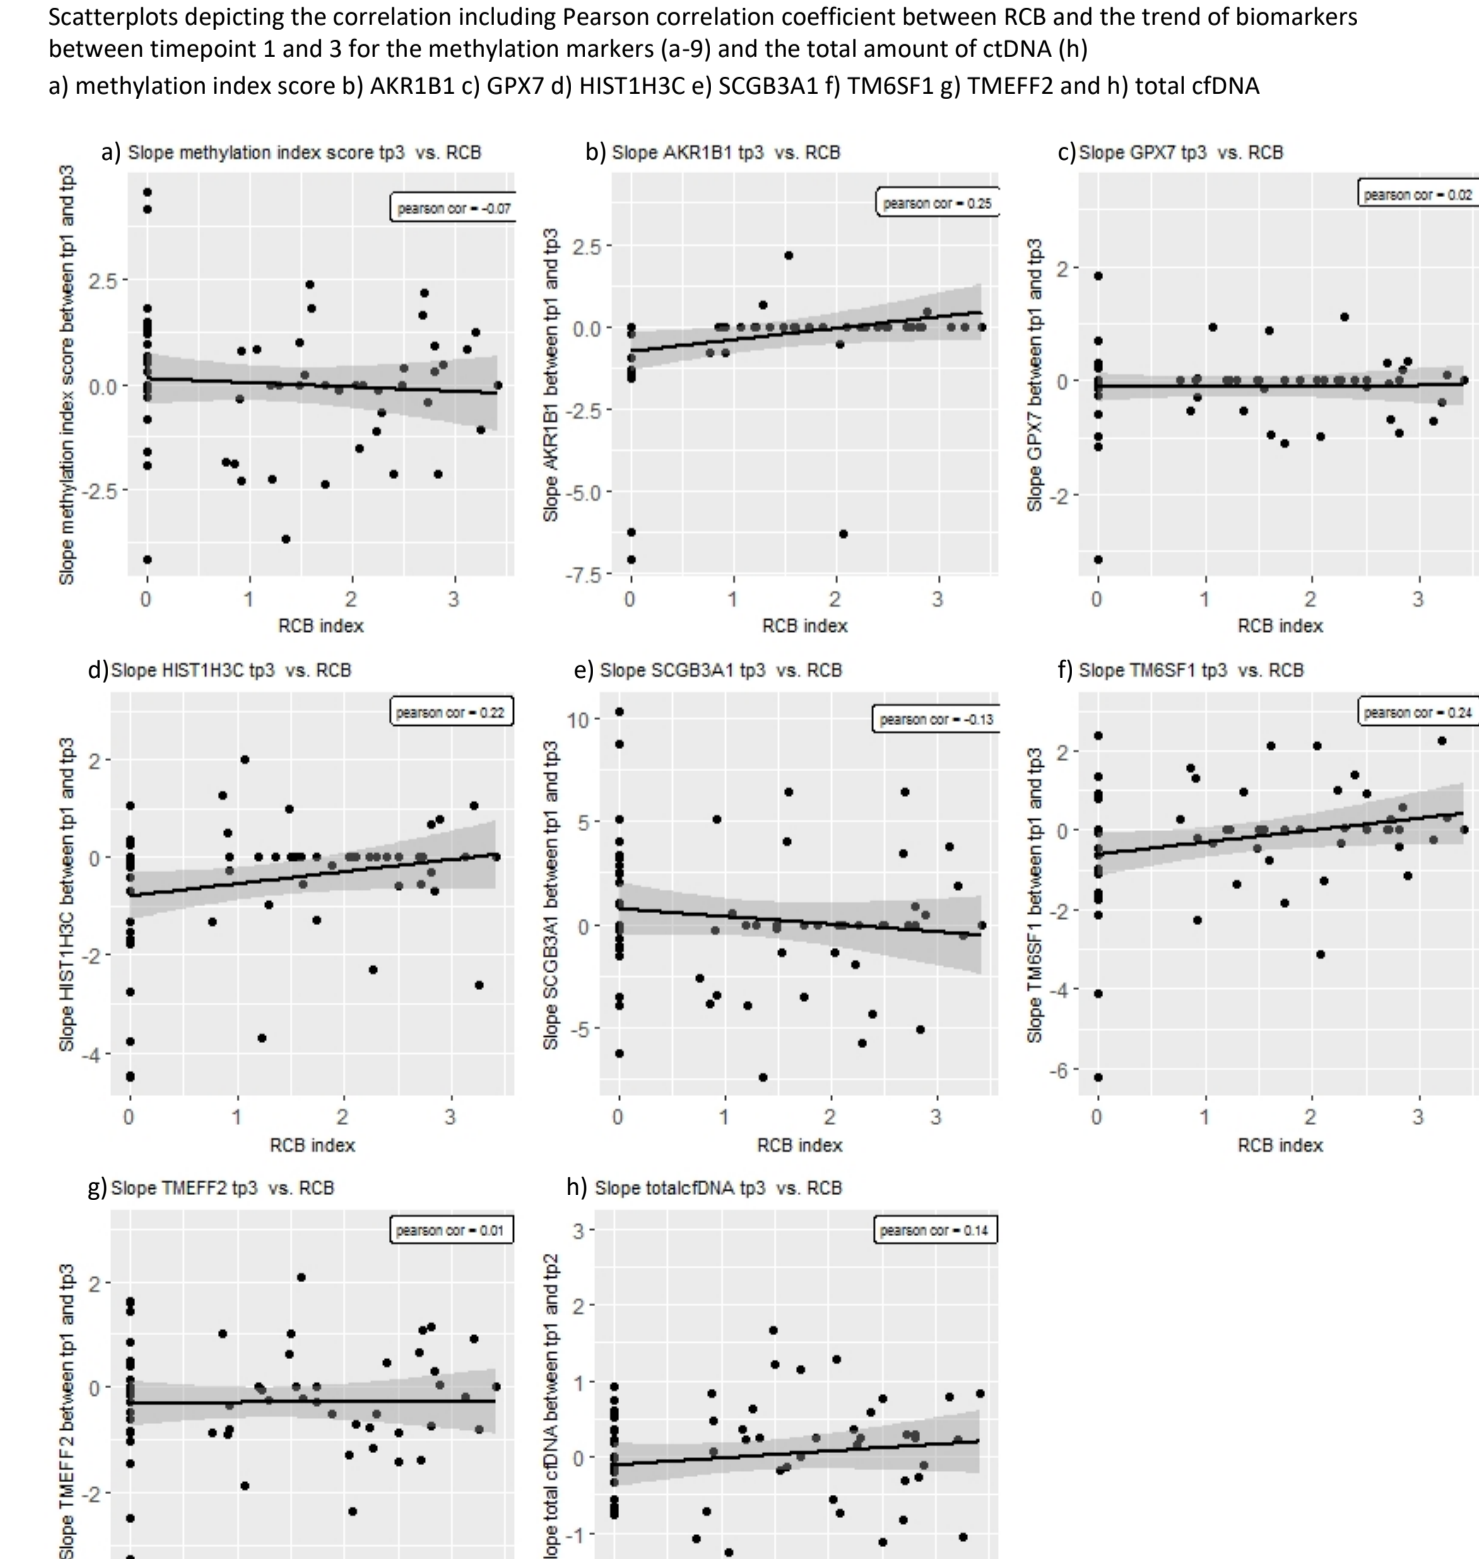

### Supplementary Table 1: ctDNA alterations detected

| Alteration*            | Number of times it was detected** |
|------------------------|-----------------------------------|
| ESR1:pV392I            | 1                                 |
| PIK3CA:pE542K          | 1                                 |
| PIK3CA:pE545K          | 2                                 |
| TP53:pR273H            | 2                                 |
| TP53:pY220C            | 3                                 |
| TP53:pR175H            | 1                                 |
| ERBB2 amplification*** | 5                                 |

\*The PIK3CA mutations were detected by both the UltraSEEK and naica Crystal Digital PCR technologies

\*\*None of the alterations were detected in more than one sample of the same patient

\*\*\* ERBB2 amplification was not found in all patients in HER2+ disease on IHC

### Supplementary Table 2: Summary of model performance corrected for optimism by leave one out cross validation including naive confidence intervals.

| Model                                                         | Pre-treatment       |                      | On-treatment        |                      | Post-treatment      |                      |
|---------------------------------------------------------------|---------------------|----------------------|---------------------|----------------------|---------------------|----------------------|
|                                                               | AUC<br>(95% CI)     | MSE<br>(95% CI)      | AUC<br>(95% CI)     | MSE<br>(95% CI)      | AUC<br>(95% CI)     | MSE<br>(95% CI)      |
| <b>Clinical-radiological</b>                                  | 0.76<br>(0.62-0.88) | 0.94<br>(0.63-1.33)  | 0.83<br>(0.71-0.93) | 0.86<br>(0.60-1.16)  | 0.82<br>(0.71-0.92) | 0.87<br>(0.61-1.18)  |
| <b>Liquid biopsies</b>                                        | NA                  | NA                   | 0.51<br>(0.34-0.67) | 1.57<br>(1.22-1.98)  | 0.76<br>(0.63-0.88) | 1.27<br>(1.00-1.60)  |
| <b>MRI features</b>                                           | NA                  | NA                   | 0.66<br>(0.51-0.81) | 1.27<br>(0.92-1.66)  | 0.69<br>(0.53-0.81) | 1.25<br>(0.93-1.60)  |
| <b>Clinical-radiological + liquid biopsies</b>                | 0.77<br>(0.64-0.88) | 0.99<br>(0.63-1.42)  | 0.82<br>(0.71-0.92) | 0.88<br>(0.58-1.18)  | 0.86<br>(0.76-0.94) | 0.82<br>(0.54-1.12)  |
| <b>Clinical-radiological + MRI features</b>                   | 0.77<br>(0.64-0.88) | 0.99<br>(0.65-1.41)  | 0.82<br>(0.70-0.92) | 0.88<br>(0.57-1.23)  | 0.83<br>(0.70-0.93) | 0.89<br>(0.56-1.24)  |
| <b>Liquid biopsies + MRI features</b>                         | NA                  | NA                   | 0.64<br>(0.47-0.78) | 1.38<br>(1.01-1.83)  | 0.76<br>(0.64-0.88) | 1.24<br>(0.92-1.57)  |
| <b>Clinical-radiological + Liquid biopsies + MRI features</b> | 0.76<br>(0.63-0.88) | 1.03<br>(0.67-1.46)  | 0.81<br>(0.70-0.91) | 0.91<br>(0.59-1.25)  | 0.86<br>(0.75-0.94) | 0.84<br>(0.56-1.16)  |
| <b>Only clinical</b>                                          | 0.76<br>(0.62-0.87) | 0.94<br>(0.62-1.36)  | 0.76<br>(0.62-0.87) | 0.94<br>(0.62-1.36)  | 0.76<br>(0.62-0.87) | 0.94<br>(0.62-1.36)  |
| <b>Only clinical + liquid biopsies</b>                        | 0.76<br>(0.63-0.87) | 0.98<br>(0.62, 1.42) | 0.78<br>(0.65-0.88) | 0.98<br>(0.67-1.39)  | 0.85<br>(0.74-0.94) | 0.89<br>(0.58-1.29)  |
| <b>Only clinical + MRI features</b>                           | 0.76<br>(0.63-0.87) | 0.98<br>(0.63-1.39)  | 0.82<br>(0.71-0.91) | 0.92<br>(0.57- 1.41) | 0.84<br>(0.72-0.93) | 0.95<br>(0.59- 1.42) |
| <b>Only clinical + MRI features + liquid biopsies</b>         | 0.76<br>(0.63-0.87) | 1.01<br>(0.65-1.43)  | 0.81<br>(0.70-0.91) | 0.97<br>(0.62-1.45)  | 0.85<br>(0.74-0.93) | 0.91<br>(0.57-1.35)  |

CI = confidence interval, AUC = area under the receiver operating characteristic curve for predicting pCR (RCB 0), MSE = mean standard error, measures the average squared difference between the observed and predicted values. A lower value indicates a better fit of the model. NA = not applicable, no predictors remained in the model.

### Supplementary Table 3: Coefficients of prediction models

| Model                                      | Predictor                  | Coefficient |
|--------------------------------------------|----------------------------|-------------|
| <b>Clinical-radiological pre-treatment</b> | (Intercept)                | 1.50        |
|                                            | IHC subtype ER-/HER2-      | -0.76       |
|                                            | IHC subtype ER+/-/HER2+    | -0.74       |
|                                            | Grade 3                    | -0.54       |
|                                            | Tumor size on baseline MRI | 0           |
|                                            | Nodal status               | 0.89        |
|                                            | (Intercept)                | 0.84        |

|                                             |                                                             |       |
|---------------------------------------------|-------------------------------------------------------------|-------|
| <b>Clinical-radiological on-treatment</b>   | IHC subtype ER-/HER2-                                       | -0.56 |
|                                             | IHC subtype ER+/-/HER2+                                     | -0.58 |
|                                             | Grade 3                                                     | -0.45 |
|                                             | Tumor size on baseline MRI                                  | 0     |
|                                             | Nodal status                                                | 0.71  |
|                                             | Relative change in tumor size on MRI 2 compared to baseline | 0.01  |
| <b>Clinical-radiological post-treatment</b> | (Intercept)                                                 | 0.83  |
|                                             | IHC subtype ER-/HER2-                                       | -0.54 |
|                                             | IHC subtype ER+/-/HER2+                                     | -0.55 |
|                                             | Grade 3                                                     | -0.45 |
|                                             | Tumor size on baseline MRI                                  | 0     |
|                                             | Nodal status                                                | 0.70  |
|                                             | Relative change in tumor size on MRI 2 compared to baseline | 0.01  |
|                                             | Relative change in tumor size on MRI 3 compared to baseline | 0     |
| <b>Liquid biopsies pre-treatment</b>        | (Intercept)                                                 | 1.25  |
|                                             | Amplifiable copies                                          | 0     |
|                                             | cfDNA integrity                                             | 0     |
|                                             | Methylation scores                                          | 0     |
|                                             | Mutations                                                   | 0     |
|                                             | Plasma DNA concentration                                    | 0     |
| <b>MRI features pre-treatment</b>           | (Intercept)                                                 | 1.25  |
|                                             | ADC                                                         | 0     |
|                                             | Diameter                                                    | 0     |
|                                             | Heterogeneity                                               | 0     |
|                                             | Kinetics                                                    | 0     |
|                                             | Margin                                                      | 0     |
|                                             | Shape                                                       | 0     |
|                                             | T2                                                          | 0     |
|                                             | Uptake                                                      | 0     |
|                                             | Volume                                                      | 0     |
| <b>Liquid biopsies on-treatment</b>         | (Intercept)                                                 | 0     |
|                                             | Amplifiable copies                                          | 1.00  |
|                                             | cfDNA integrity                                             | 0     |
|                                             | Methylation scores                                          | 0     |
|                                             | Mutations                                                   | 0     |
|                                             | Plasma DNA concentration                                    | 0     |
| <b>MRI features on-treatment</b>            | (Intercept)                                                 | 0.12  |
|                                             | ADC                                                         | 0     |
|                                             | Diameter                                                    | 0     |

|                                                                |                                       |       |
|----------------------------------------------------------------|---------------------------------------|-------|
|                                                                | Heterogeneity                         | 0     |
|                                                                | Kinetics                              | 0     |
|                                                                | Margin                                | 0     |
|                                                                | Shape                                 | 0     |
|                                                                | T2                                    | 0     |
|                                                                | Uptake                                | 0     |
|                                                                | Volume                                | 0.90  |
| <b>Liquid biopsies post-treatment</b>                          | (Intercept)                           | -2.82 |
|                                                                | Amplifiable copies                    | 1.15  |
|                                                                | cfDNA integrity                       | 0     |
|                                                                | Methylation                           | 2.10  |
|                                                                | Mutations                             | 0     |
|                                                                | Plasma DNA concentration              | 0     |
| <b>MRI features post-treatment</b>                             | (Intercept)                           | -0.33 |
|                                                                | ADC                                   | 0     |
|                                                                | Diameter                              | 0.10  |
|                                                                | Heterogeneity                         | 0     |
|                                                                | Kinetics                              | 0     |
|                                                                | Margin                                | 0     |
|                                                                | Shape                                 | 0     |
|                                                                | T2                                    | 0.39  |
|                                                                | Uptake                                | 0     |
|                                                                | Volume                                | 0.78  |
| <b>Clinical-radiological + liquid biopsies pre-treatment</b>   | (Intercept)                           | -0.15 |
|                                                                | Clinical-radiological model           | 1.12  |
|                                                                | Liquid biopsies model                 | 0     |
| <b>Clinical radiological + MRI features pre-treatment</b>      | (Intercept)                           | -0.15 |
|                                                                | Clinical-radiological model           | 1.12  |
|                                                                | Computer extracted MRI features model | 0     |
| <b>Clinical radiological + LB + MRI features pre-treatment</b> | (Intercept)                           | -0.15 |
|                                                                | Clinical-radiological model           | 1.12  |
|                                                                | Liquid biopsies model                 | 0     |
|                                                                | Computer extracted MRI features model | 0     |
| <b>Clinical radiological + liquid biopsies on-treatment</b>    | (Intercept)                           | -0.65 |
|                                                                | Clinical-radiological model           | 1.08  |
|                                                                | Liquid biopsies model                 | 0.44  |
| <b>Clinical radiological + MRI features on-treatment</b>       | (Intercept)                           | -0.50 |
|                                                                | Clinical-radiological model           | 1.02  |
|                                                                | Computer extracted MRI features model | 0.38  |

|                                                                              |                                       |       |
|------------------------------------------------------------------------------|---------------------------------------|-------|
| <b>Liquid biopsies + MRI features on-treatment</b>                           | (Intercept)                           | -0.91 |
|                                                                              | Liquid biopsies model                 | 0.62  |
|                                                                              | Computer extracted MRI features model | 1.11  |
| <b>Clinical radiological + liquid biopsies + MRI features on-treatment</b>   | (Intercept)                           | -0.86 |
|                                                                              | Clinical-radiological model           | 0.98  |
|                                                                              | Liquid biopsies model                 | 0.39  |
|                                                                              | Computer extracted MRI features model | 0.32  |
| <b>Clinical radiological + liquid biopsies post-treatment</b>                | (Intercept)                           | -0.67 |
|                                                                              | Clinical-radiological model           | 0.98  |
|                                                                              | Liquid biopsies model                 | 0.55  |
| <b>Clinical radiological + MRI features post-treatment</b>                   | (Intercept)                           | -0.45 |
|                                                                              | Clinical-radiological model           | 1.03  |
|                                                                              | Computer extracted MRI features model | 0.33  |
| <b>Liquid biopsies + MRI features post-treatment</b>                         | (Intercept)                           | -0.47 |
|                                                                              | Liquid biopsies model                 | 0.67  |
|                                                                              | Computer extracted MRI features model | 0.71  |
| <b>Clinical radiological + liquid biopsies + MRI features post-treatment</b> | (Intercept)                           | -0.55 |
|                                                                              | Clinical-radiological model           | 0.94  |
|                                                                              | Liquid biopsies model                 | 0.50  |
|                                                                              | Computer extracted MRI features model | 0     |
| <b>Only clinical model</b>                                                   | (Intercept)                           | 1.55  |
|                                                                              | IHC subtype ER-/HER2-                 | -0.85 |
|                                                                              | IHC subtype ER+/-/HER2+               | -0.88 |
|                                                                              | Grade 3                               | -0.59 |
|                                                                              | Nodal status                          | 0.96  |
| <b>Only clinical + liquid biopsies pre-treatment</b>                         | (Intercept)                           | -0.02 |
|                                                                              | Only clinical model                   | 1.02  |
|                                                                              | Liquid biopsies model                 | 0     |
| <b>Only clinical + MRI features pre-treatment</b>                            | (Intercept)                           | -0.02 |
|                                                                              | Only clinical model                   | 1.02  |
|                                                                              | Computer extracted MRI features model | 0     |
| <b>Only clinical + MRI features + liquid biopsies pre-treatment</b>          | (Intercept)                           | -0.02 |
|                                                                              | Only clinical model                   | 1.02  |
|                                                                              | Liquid biopsies model                 | 0     |
|                                                                              | Computer extracted MRI features model | 0     |
| <b>Only clinical + liquid biopsies on-treatment</b>                          | (Intercept)                           | -0.61 |
|                                                                              | Only clinical model                   | 0.93  |
|                                                                              | Liquid biopsies model                 | 0.55  |

|                                                                      |                                       |       |
|----------------------------------------------------------------------|---------------------------------------|-------|
| <b>Only clinical + MRI features on-treatment</b>                     | (Intercept)                           | -0.75 |
|                                                                      | Only clinical model                   | 0.83  |
|                                                                      | Computer extracted MRI features model | 0.76  |
| <b>Only clinical + MRI features + liquid biopsies on-treatment</b>   | (Intercept)                           | -1.08 |
|                                                                      | Only clinical model                   | 0.80  |
|                                                                      | Liquid biopsies model                 | 0.39  |
|                                                                      | Computer extracted MRI features model | 0.68  |
| <b>Only clinical + liquid biopsies post-treatment</b>                | (Intercept)                           | -0.62 |
|                                                                      | Only clinical model                   | 0.82  |
|                                                                      | Liquid biopsies model                 | 0.67  |
| <b>Only clinical + MRI features post-treatment</b>                   | (Intercept)                           | -0.59 |
|                                                                      | Only clinical model                   | 0.82  |
|                                                                      | Computer extracted MRI features model | 0.66  |
| <b>Only clinical + MRI features + liquid biopsies post-treatment</b> | (Intercept)                           | -0.81 |
|                                                                      | Only clinical model                   | 0.76  |
|                                                                      | Liquid biopsies model                 | 0.53  |
|                                                                      | Computer extracted MRI features model | 0.36  |
